# Supplementary figures and images for: Distinct domains in Ndc1 mediate its interaction with the Nup84 complex and the nuclear membrane
Source: PubMed Central journal article supplement — J Cell Biol. 2023 May 8;222(6):e202210059. doi: 10.1083/jcb.202210059 (PMC10165475; doi:10.1083/jcb.202210059), 2023-05-08

# SourceDataF1

**A**

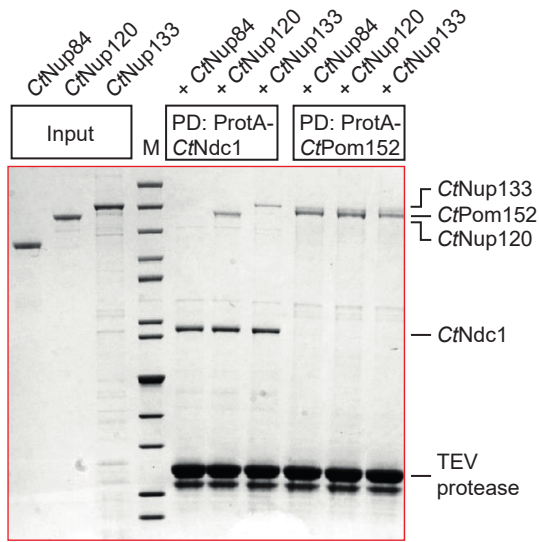

**C**

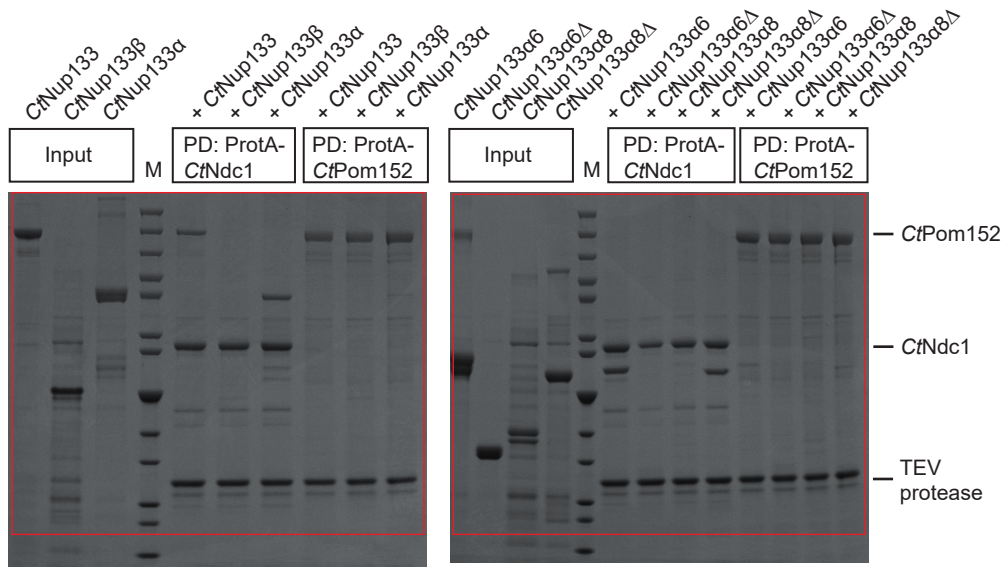

**D**

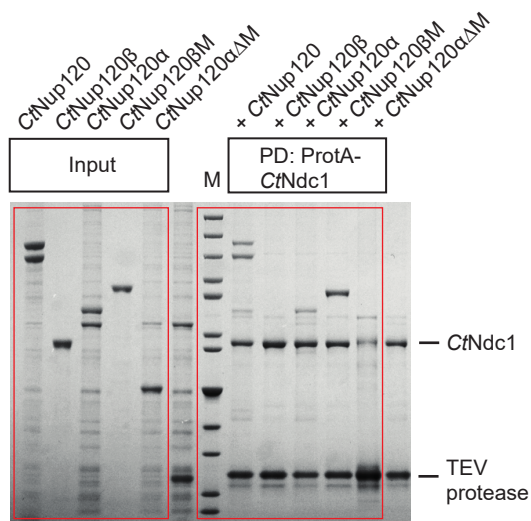

Supplement: JCB_202210059_SourceDataF1.pdf [file JCB_202210059_SourceDataF1.pdf]

# SourceDataF3

E

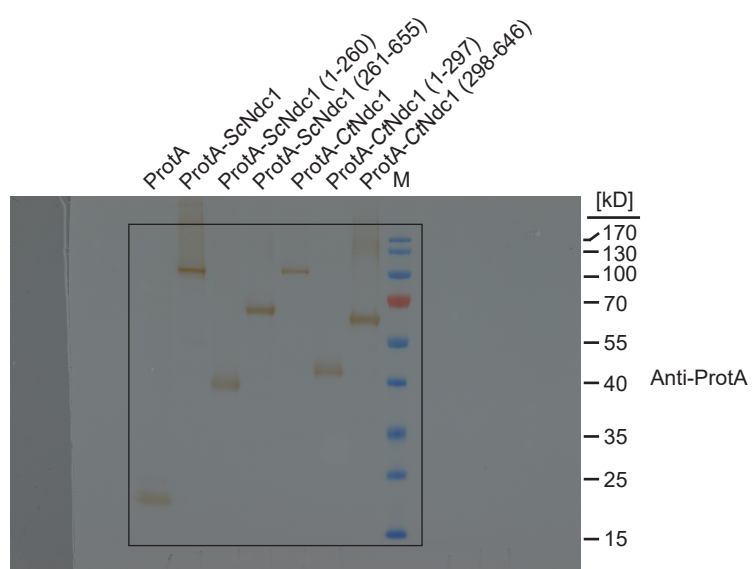

Supplement: JCB_202210059_SourceDataF3.pdf [file JCB_202210059_SourceDataF3.pdf]

# SourceDataF4

F

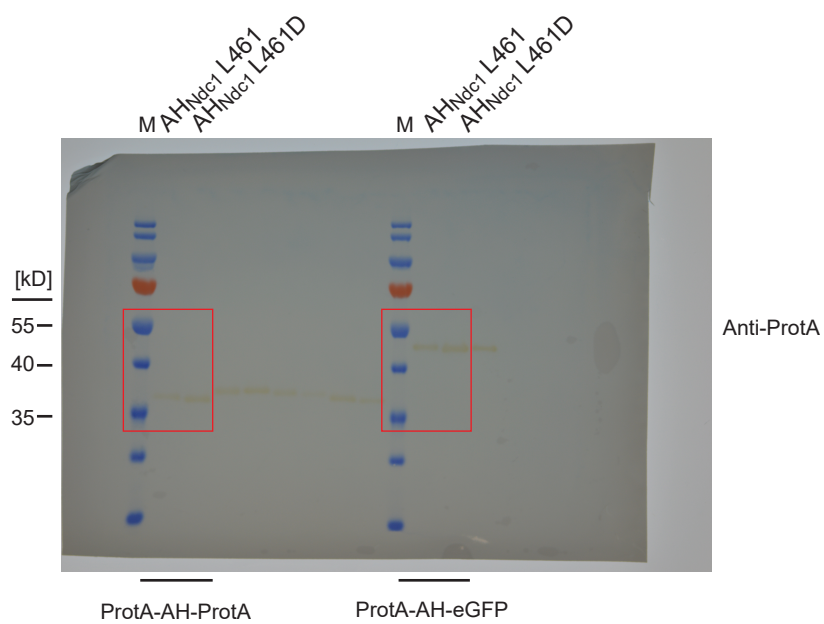

Supplement: JCB_202210059_SourceDataF4.pdf [file JCB_202210059_SourceDataF4.pdf]

# SourceDataFS1

## A

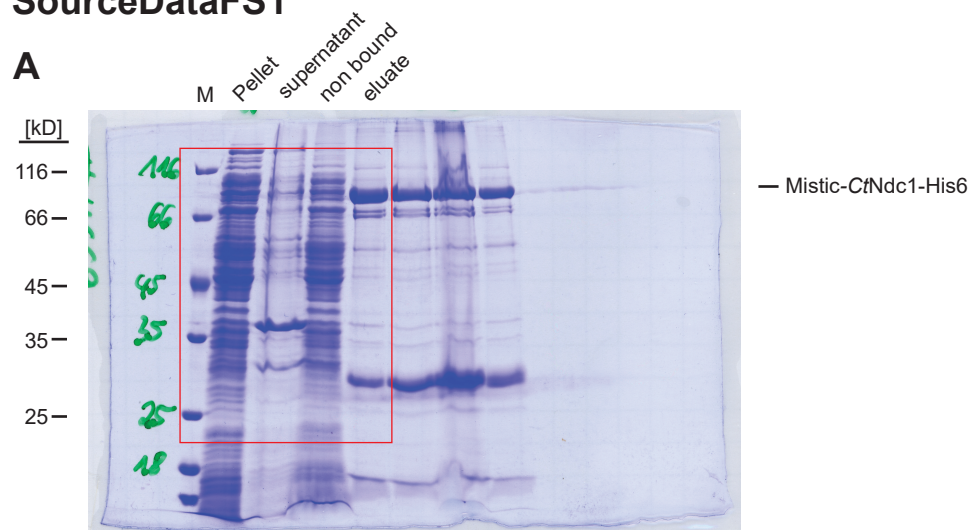

## B

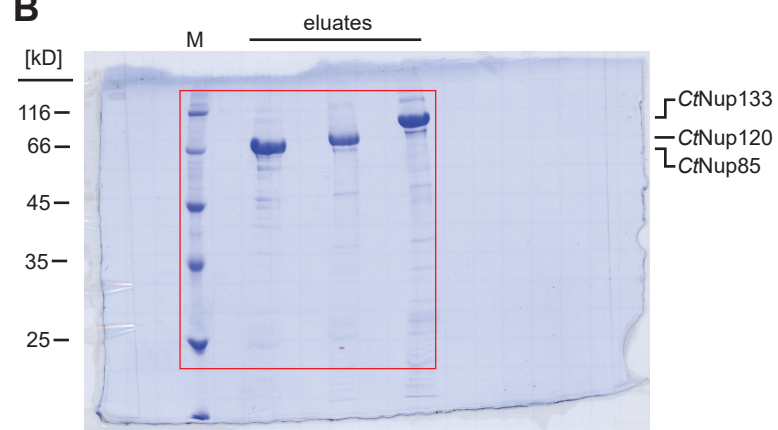

## D

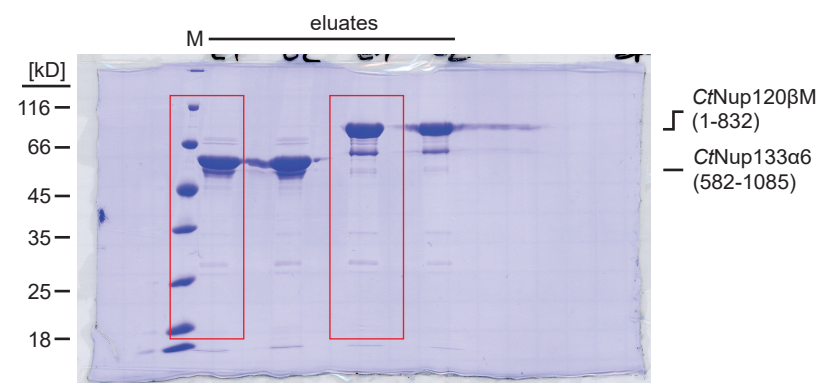

## F

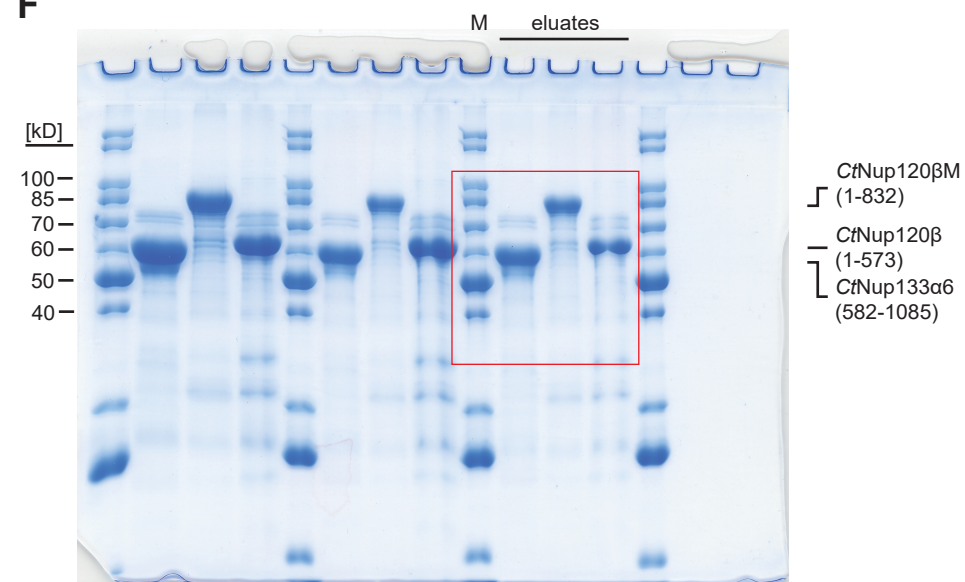

Supplement: JCB_202210059_SourceDataFS1.pdf [file JCB_202210059_SourceDataFS1.pdf]

C

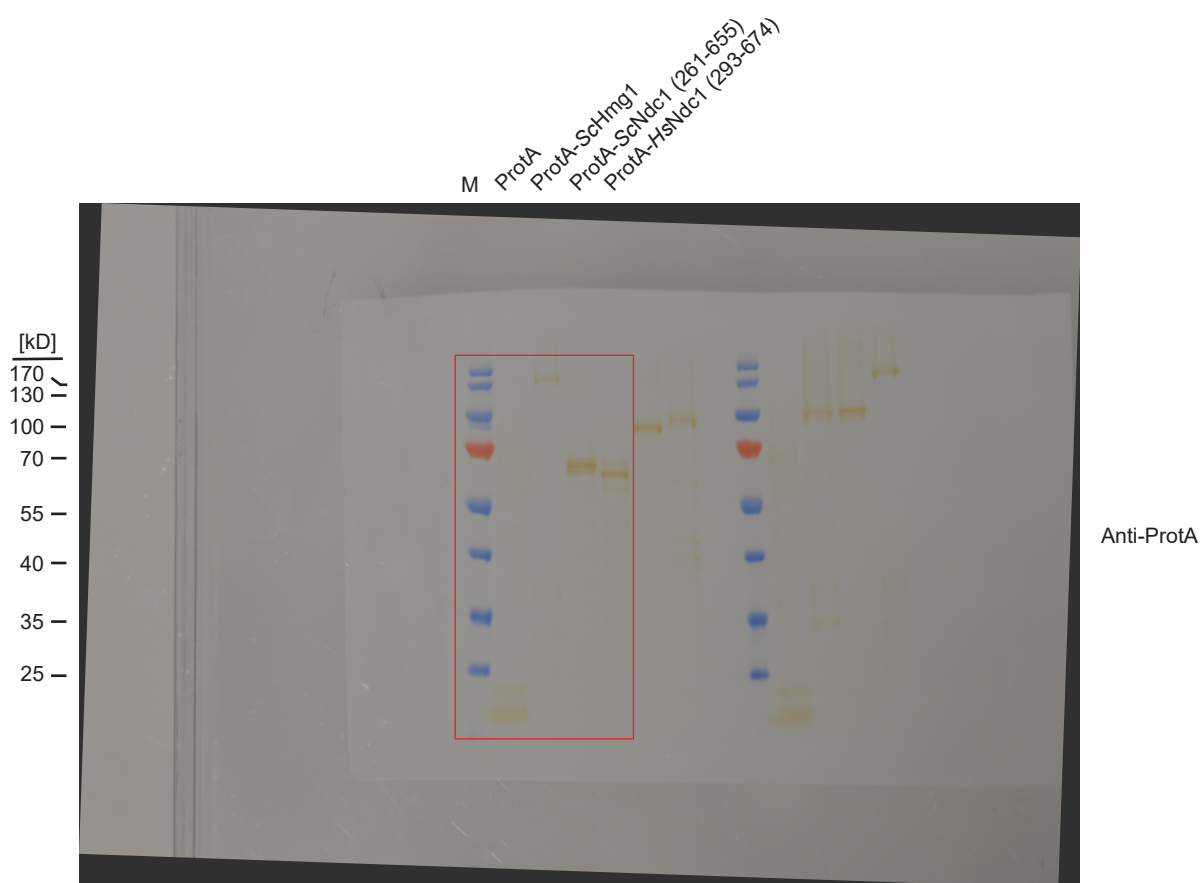

Supplement: JCB_202210059_SourceDataFS2.pdf [file JCB_202210059_SourceDataFS2.pdf]

C

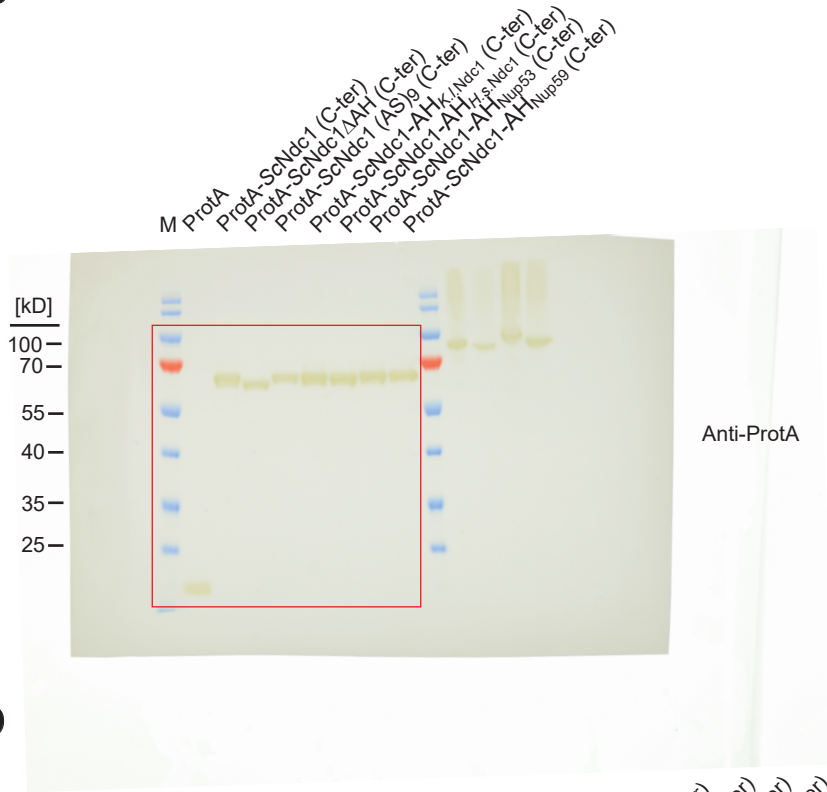

D

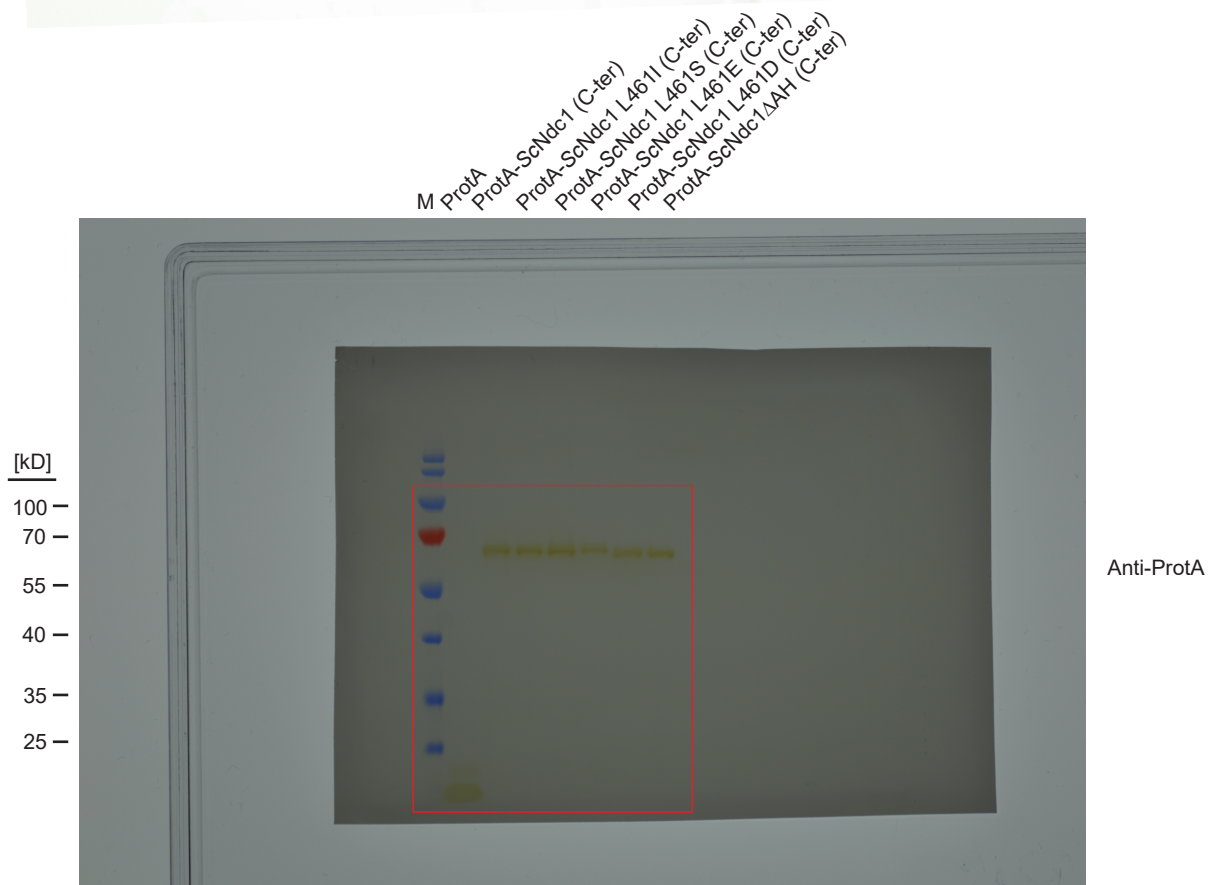

Supplement: JCB_202210059_SourceDataFS3.pdf [file JCB_202210059_SourceDataFS3.pdf]

A

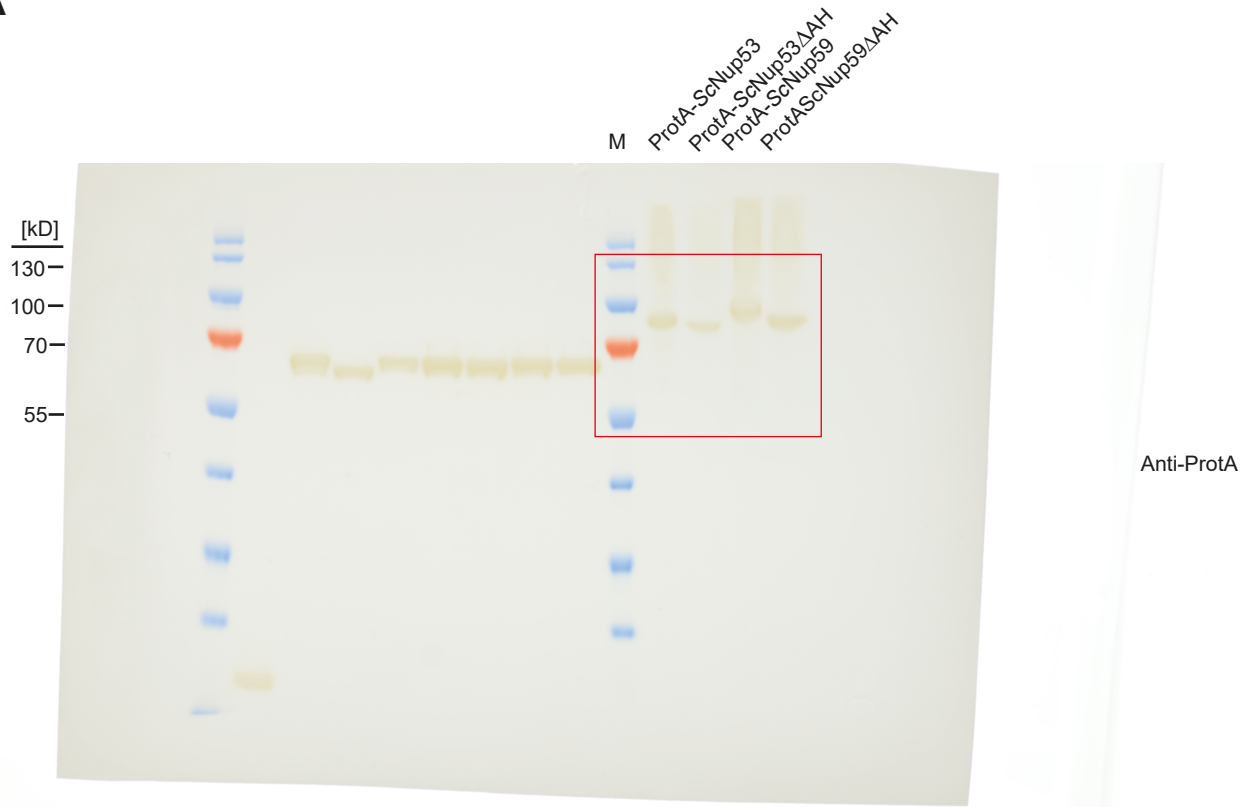

E

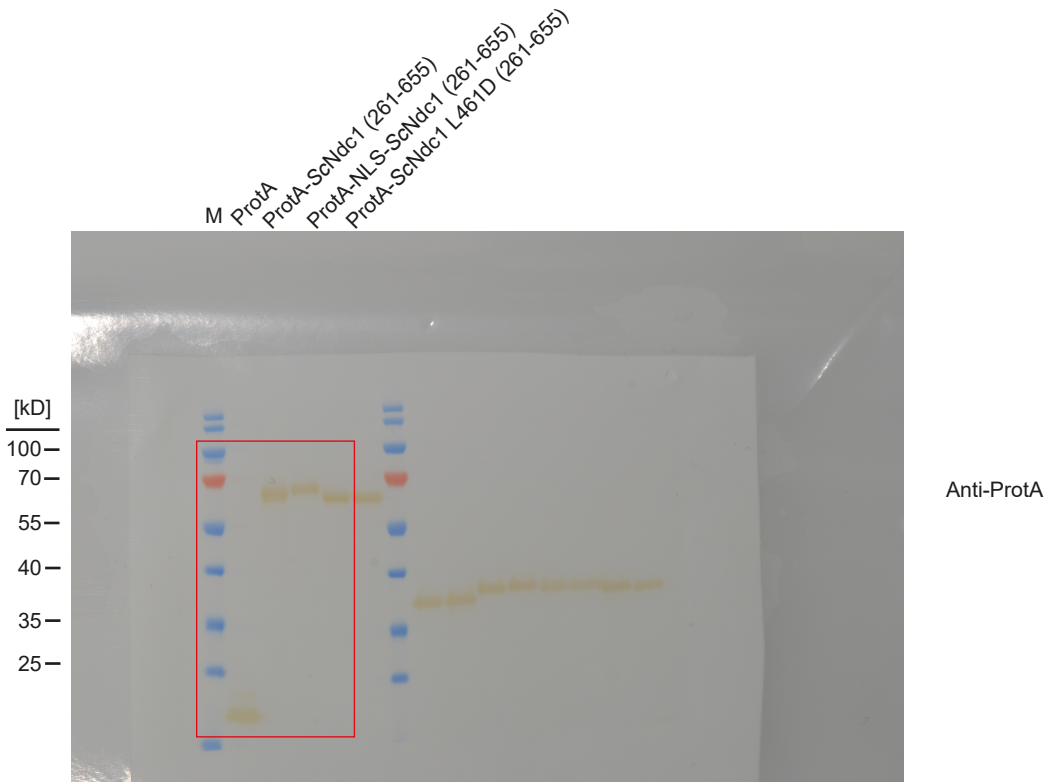

Supplement: JCB_202210059_SourceDataFS4.pdf [file JCB_202210059_SourceDataFS4.pdf]
